# Supplementary material for: Optimization of misfit calcium cobaltite oxygen electrodes for solid oxide fuel cells through electrospinning processing
Source: Royal Society of Chemistry journal article supplement (doi:10.1039/d4ta04085f), 2024-01-01
Supplement: d4ta04085f1.pdf [file d4ta04085f1.pdf]

**Electronic Supplementary Information (ESI) for:**

**Optimization of misfit calcium cobaltite oxygen  
electrodes for solid oxide fuel cells through  
electrospinning processing**

Allan J. M. Araújo,<sup>\*a,b</sup> Itzhak I. Maor,<sup>c</sup> Laura I. V. Holz,<sup>a,b</sup> Meirav Mann-Lahav,<sup>c</sup>

Vadim Beilin,<sup>c</sup> Armin Feldhoff,<sup>d</sup> Gideon S. Grader,<sup>\*\*c,e</sup> Francisco J. A. Loureiro<sup>\*\*\*a,b</sup>

<sup>a</sup> TEMA - Centre for Mechanical Technology and Automation, Department of Mechanical Engineering, University of Aveiro, 3810-193 Aveiro, Portugal.

<sup>b</sup> LASI - Intelligent Systems Associate Laboratory, 4800-058, Guimarães, Portugal.

<sup>c</sup> Wolfson Department of Chemical Engineering, Technion – Israel Institute of Technology, 3200003 Haifa, Israel.

<sup>d</sup> Institute of Physical Chemistry and Electrochemistry, Leibniz University Hannover, 30167 Hannover, Germany.

<sup>e</sup> The Nancy & Stephan Grand Technion Energy Program (GTEP), Technion – Israel Institute of Technology, 3200003 Haifa, Israel.

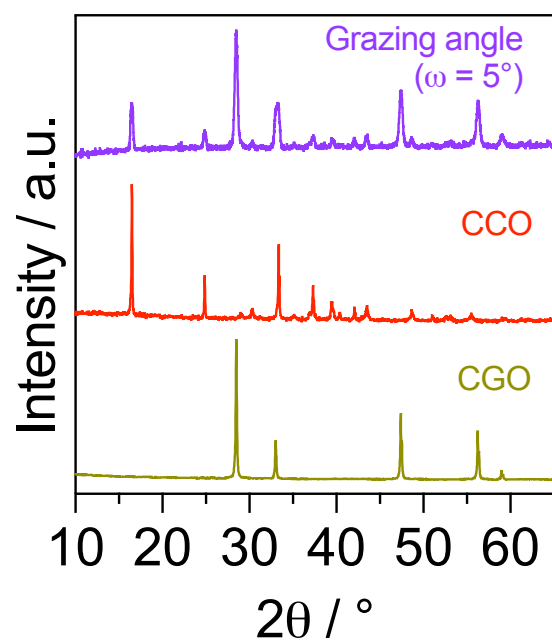

Fig. S1 – Grazing angle X-ray diffraction patterns obtained for ES-CCO\_SP-5D symmetrical cell electrodes.

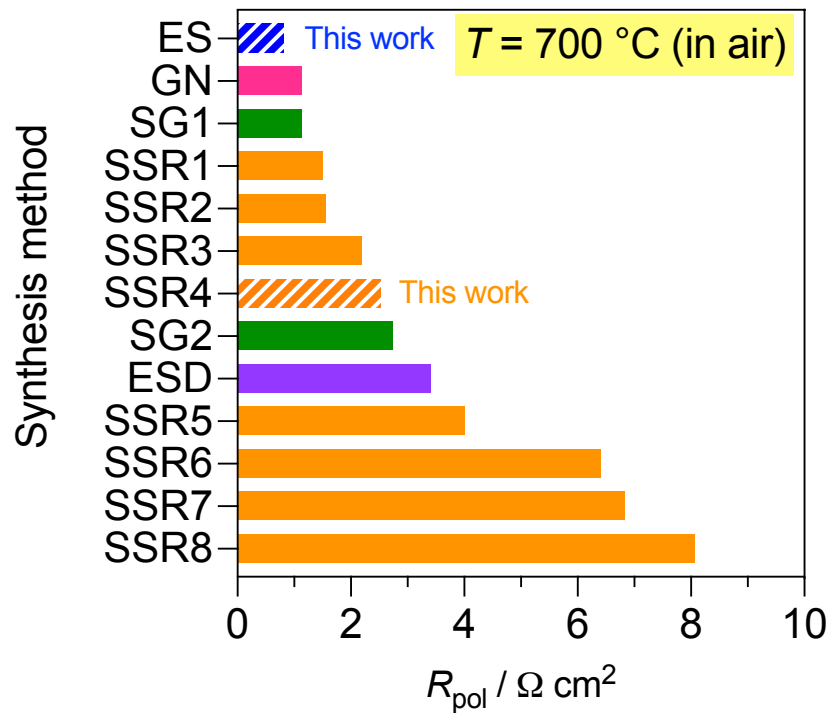

Fig. S2 – Literature survey on CCO electrodes for SOFC applications. Captions: **ES** – (electrospinning, ES-CCO\_SP-5D); **GN** – (Glycerol nitrate combustion, <https://doi.org/10.1016/j.ceramint.2023.03.281>); **SG1** – (Sol-gel, <https://doi.org/10.1016/j.jallcom.2016.09.297>); **SSR1** – (Solid-state reaction, <https://doi.org/10.1016/j.jpowsour.2011.08.110>); **SSR2** – (Solid-state reaction, <https://doi.org/10.1016/j.jpowsour.2015.01.150>); **SSR3** – (Solid-state reaction, <https://doi.org/10.1016/j.ijhydene.2017.12.040>); **SSR4** – (Solid-state reaction, ES-CCO\_SP-5D electrode); **SG2** – (Sol-gel, <https://doi.org/10.1016/j.electacta.2018.08.018>); **ESD** – (Electrostatic spray deposition, <https://doi.org/10.1016/j.electacta.2020.137142>); **SSR5** – (Solid-state reaction, <https://doi.org/10.1021/cm902040v>); **SSR6** – (Solid-state reaction, <https://doi.org/10.1016/j.jpowsour.2011.02.030>); **SSR7** – (Solid-state reaction, <https://doi.org/10.1016/j.ceramint.2017.04.099>); **SSR8** – (Solid-state reaction, <https://doi.org/10.1016/j.jallcom.2019.02.209>).

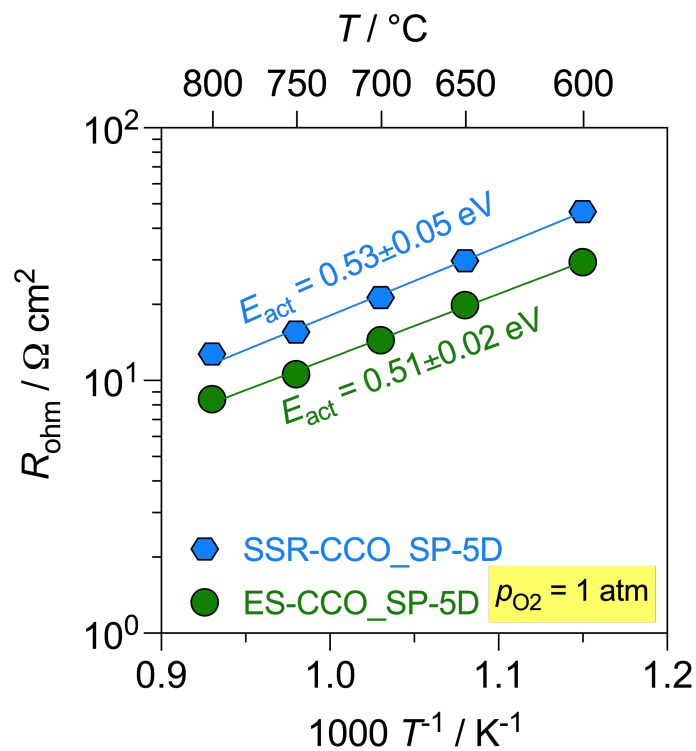

Fig. S3 – Ohmic ( $R_{ohm}$ ) polarization resistance as a function of the reciprocal temperature for the SSR-CCO\_SP-5D and the ES-CCO\_SP-5D electrodes in oxygen ( $p_{O_2} = 1 \text{ atm}$ ).

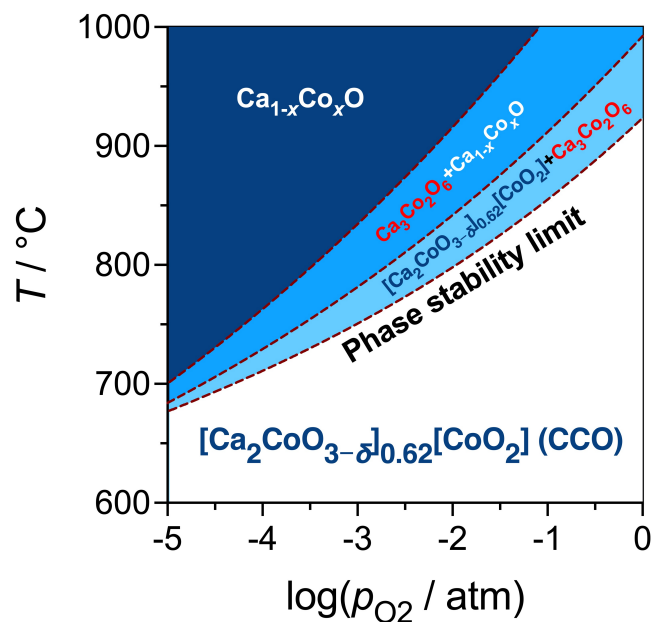

Fig. S4 – Phase stability diagram of the misfit  $[Ca_2CoO_{3-\delta}]_q[CoO_2]$  compound. Calculations performed on thermodynamic data extended from <https://doi.org/10.1016/j.jssc.2012.05.014>.
